# Supplementary material
Source: PubMed Central journal article supplement (PMC3130071)
Supplement: NIHMS258482-supplement-1_si_001.pdf [file NIHMS258482-supplement-1_si_001.pdf]

# Supporting Information

For

## XAS and DFT Investigation of Mononuclear Cobalt(III)-Peroxo Complexes: Electronic Control of Geometric Structure in $\text{CoO}_2$ versus $\text{NiO}_2$ Systems

*Ritimukta Sarangi,<sup>1\*</sup> Jaeheung Cho,<sup>2</sup> Wonwoo Nam,<sup>2</sup> Edward I. Solomon<sup>1,3\*</sup>*

<sup>1</sup>Stanford Synchrotron Radiation Laboratory, SLAC National Accelerator Laboratory, Menlo Park, CA  
94025, USA

<sup>2</sup>Department of Chemistry and Nano Science, Department of Bioinspired Science, Center for  
Biomimetic Systems, Ewha Womans University, Seoul 120-750, Korea

<sup>3</sup>Department of Chemistry, Stanford University, Stanford, CA 94305, USA

The final geometry optimized xyz coordinates obtained from the DFT calculation on [(14-TMC)CoO<sub>2</sub>]<sup>+</sup> (UBP86, basis sets: CP(PPP) on Co and TZVP on the rest of the atoms, Conductor like screening model with CH<sub>2</sub>Cl<sub>2</sub> as dielectric.)

|    |           |           |           |
|----|-----------|-----------|-----------|
| Co | -0.076747 | 0.279004  | -0.015814 |
| N  | 0.676552  | -0.034662 | -2.169197 |
| N  | 1.959447  | -0.205282 | 0.496584  |
| N  | -0.687961 | -0.013978 | 2.191932  |
| N  | -1.691085 | -1.094862 | -0.379437 |
| C  | 0.159927  | 1.019467  | -3.072574 |
| C  | 2.135918  | 0.162985  | -1.965136 |
| C  | 2.633671  | -0.633665 | -0.768793 |
| C  | 2.630495  | 1.043964  | 0.967644  |
| C  | 2.151956  | -1.278891 | 1.521956  |
| C  | 1.579238  | -0.962393 | 2.901107  |
| C  | 0.059349  | -1.034348 | 2.987970  |
| C  | -0.699938 | 1.277809  | 2.916360  |
| C  | -2.084482 | -0.489770 | 2.009358  |
| C  | -2.155808 | -1.584706 | 0.955932  |
| C  | -2.816698 | -0.333843 | -1.001480 |
| C  | -1.373906 | -2.281592 | -1.234854 |
| C  | -0.945557 | -1.949792 | -2.661960 |
| C  | 0.462565  | -1.379740 | -2.783898 |
| O  | -1.131144 | 1.815771  | -0.157505 |
| O  | 0.216177  | 2.126379  | -0.121941 |
| H  | 0.264972  | 1.995219  | -2.584039 |
| H  | -0.901677 | 0.845331  | -3.284871 |
| H  | 0.711597  | 1.022075  | -4.030566 |
| H  | 2.309664  | 1.236802  | -1.814501 |
| H  | 2.702258  | -0.135597 | -2.866997 |
| H  | 2.439041  | -1.705944 | -0.903271 |
| H  | 3.726183  | -0.514755 | -0.667086 |
| H  | 2.082132  | 1.492722  | 1.799641  |
| H  | 2.663739  | 1.777245  | 0.156402  |
| H  | 3.660514  | 0.811177  | 1.287872  |
| H  | 3.237406  | -1.469882 | 1.613965  |
| H  | 1.689349  | -2.196100 | 1.125981  |
| H  | 1.969939  | -1.728502 | 3.589266  |
| H  | 1.964053  | -0.006386 | 3.284093  |
| H  | -0.258591 | -0.952486 | 4.044788  |
| H  | -0.249466 | -2.029837 | 2.641962  |
| H  | 0.327131  | 1.606787  | 3.114788  |
| H  | -1.228742 | 1.182533  | 3.882577  |
| H  | -1.197063 | 2.033437  | 2.297001  |
| H  | -2.695314 | 0.373234  | 1.712411  |
| H  | -2.498170 | -0.869287 | 2.962339  |
| H  | -3.190200 | -1.960915 | 0.874843  |
| H  | -1.524648 | -2.438868 | 1.234868  |
| H  | -2.485911 | 0.185422  | -1.904418 |
| H  | -3.188378 | 0.419765  | -0.300863 |
| H  | -3.636027 | -1.028265 | -1.254703 |
| H  | -2.270830 | -2.927913 | -1.264623 |
| H  | -0.577545 | -2.847375 | -0.727143 |
| H  | -0.950362 | -2.898010 | -3.222265 |
| H  | -1.687507 | -1.313139 | -3.164853 |
| H  | 0.752512  | -1.325215 | -3.850442 |
| H  | 1.152955  | -2.086846 | -2.304768 |

The final geometry optimized xyz coordinates obtained from the DFT calculation on [(12-TMC)CoO<sub>2</sub>]<sup>+</sup> (UBP86, basis sets: CP(PPP) on Co and TZVP on the rest of the atoms, Conductor like screening model

with CH<sub>2</sub>Cl<sub>2</sub> as dielectric.)

|    |           |           |           |
|----|-----------|-----------|-----------|
| Co | -0.010522 | -0.111505 | 0.000056  |
| C  | -2.343749 | 0.893665  | 1.586037  |
| H  | -3.233713 | 0.668333  | 2.195388  |
| H  | -2.624668 | 1.471545  | 0.699863  |
| H  | -1.623556 | 1.480493  | 2.164994  |
| N  | 1.667515  | -0.366230 | -1.143878 |
| N  | -1.687340 | -0.369768 | 1.145203  |
| N  | 0.937916  | -1.235089 | 1.388098  |
| C  | 2.663906  | -1.147247 | -0.318103 |
| H  | 3.290173  | -0.417453 | 0.208358  |
| H  | 3.326198  | -1.728641 | -0.977380 |
| C  | 1.614249  | -0.338932 | 2.377858  |
| H  | 0.879317  | 0.308447  | 2.863707  |
| H  | 2.335748  | 0.306934  | 1.870433  |
| H  | 2.130320  | -0.951285 | 3.135155  |
| C  | -0.091035 | -2.050981 | 2.089699  |
| H  | 0.304764  | -2.466191 | 3.032181  |
| H  | -0.360589 | -2.895517 | 1.444960  |
| C  | -1.279894 | -1.148825 | 2.374738  |
| H  | -2.134388 | -1.730758 | 2.752059  |
| H  | -1.018992 | -0.417733 | 3.149017  |
| C  | 1.965274  | -2.050699 | 0.683819  |
| H  | 1.462495  | -2.894371 | 0.196909  |
| H  | 2.698979  | -2.467275 | 1.394743  |
| C  | 2.316991  | 0.898769  | -1.590434 |
| H  | 1.593591  | 1.479083  | -2.171953 |
| H  | 2.594693  | 1.482160  | -0.706851 |
| N  | -0.952852 | -1.246679 | -1.382743 |
| C  | 1.264337  | -1.153184 | -2.369771 |
| H  | 0.999436  | -0.427088 | -3.147343 |
| H  | 2.122036  | -1.732134 | -2.744366 |
| C  | -1.633732 | -0.358527 | -2.376612 |
| H  | -2.357526 | 0.286826  | -1.871849 |
| H  | -0.902028 | 0.289536  | -2.866433 |
| H  | -2.147739 | -0.976962 | -3.130357 |
| C  | -1.976130 | -2.064277 | -0.674807 |
| H  | -2.707597 | -2.487805 | -1.383915 |
| H  | -1.469168 | -2.903224 | -0.184091 |
| C  | -2.679517 | -1.159917 | 0.322983  |
| H  | -3.338756 | -1.741859 | 0.984851  |
| H  | -3.309735 | -0.435897 | -0.206782 |
| C  | 0.080278  | -2.060416 | -2.080716 |
| H  | 0.354169  | -2.900887 | -1.432431 |
| H  | -0.313330 | -2.481693 | -3.021424 |
| H  | 3.208212  | 0.675692  | -2.198784 |
| O  | -0.420428 | 1.627778  | -0.599131 |
| O  | 0.390072  | 1.632645  | 0.591161  |

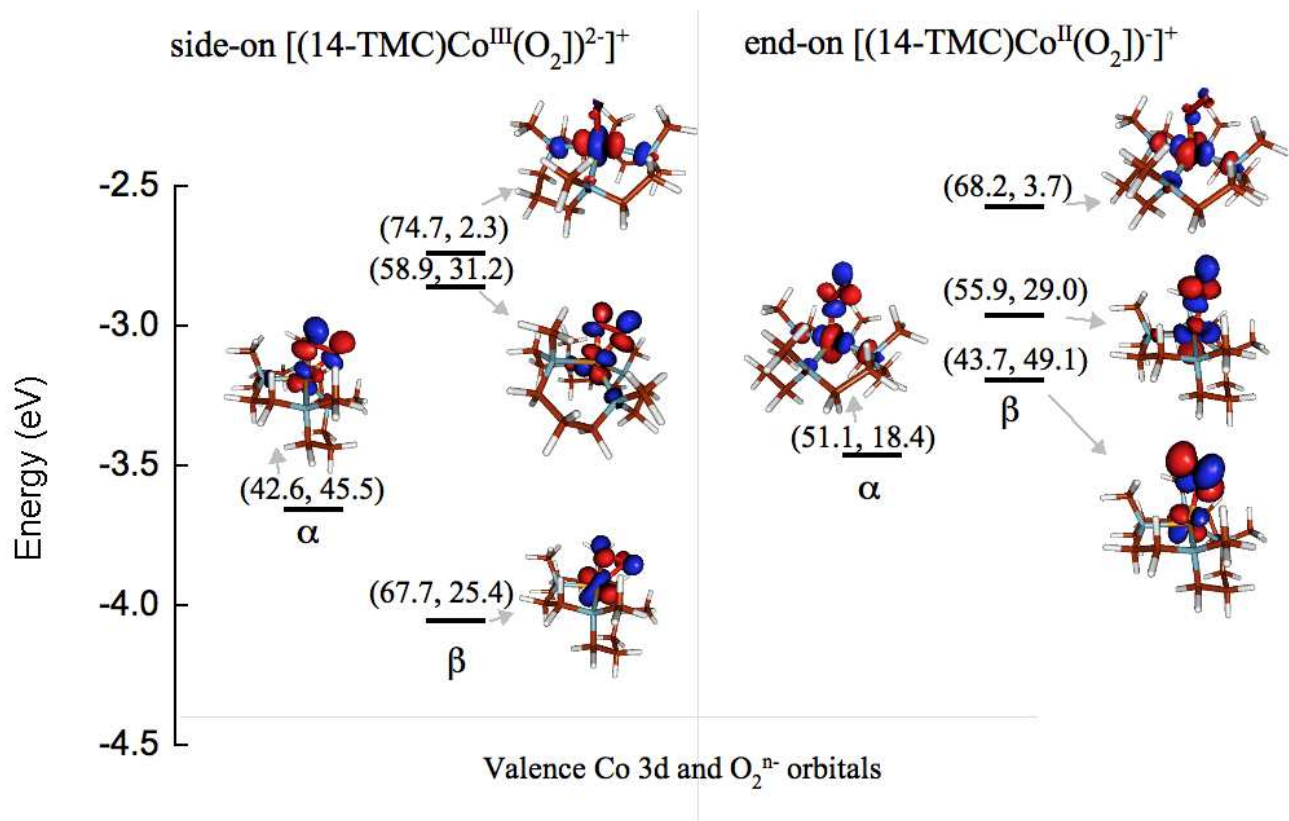

**Figure S1** The  $\alpha_{LUMO}$ ,  $\beta_{LUMO}$ ,  $\beta_{LUMO+1}$  and  $\beta_{LUMO+2}$  contour plots for the  $[(14\text{-TMC})\text{CoO}_2]^+$  complex with side-on (left panel) and end-on (right panel) bound  $\text{O}_2$  (see experimental section for details). The calculations were performed for the intermediate spin  $S=1$  state for both the end-on and side-on species. The values in brackets represent the (Co 3d,  $\text{O}_2^{n-}$  p) spin density contributions to the respective orbitals.

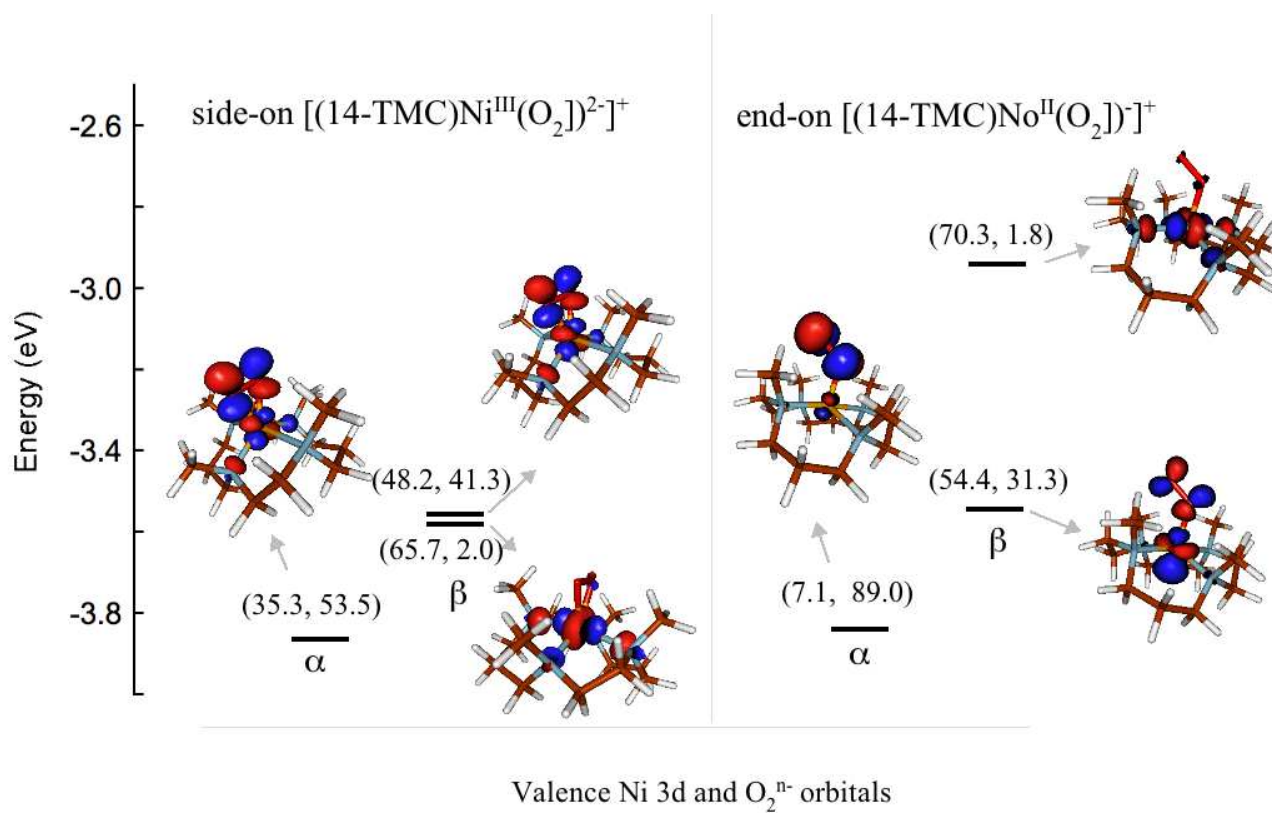

**Figure S2** The  $\alpha_{LUMO}$ ,  $\beta_{LUMO}$  and  $\beta_{LUMO+1}$  contour plots for the  $[(14\text{-TMC})\text{NiO}_2]^+$  complex with side-on (left panel) and end-on (right panel) bound  $\text{O}_2$  (see experimental section for details). The values in brackets represent the (Ni 3d,  $\text{O}_2^{\text{n-}}$  p) spin density contributions to the respective orbitals.

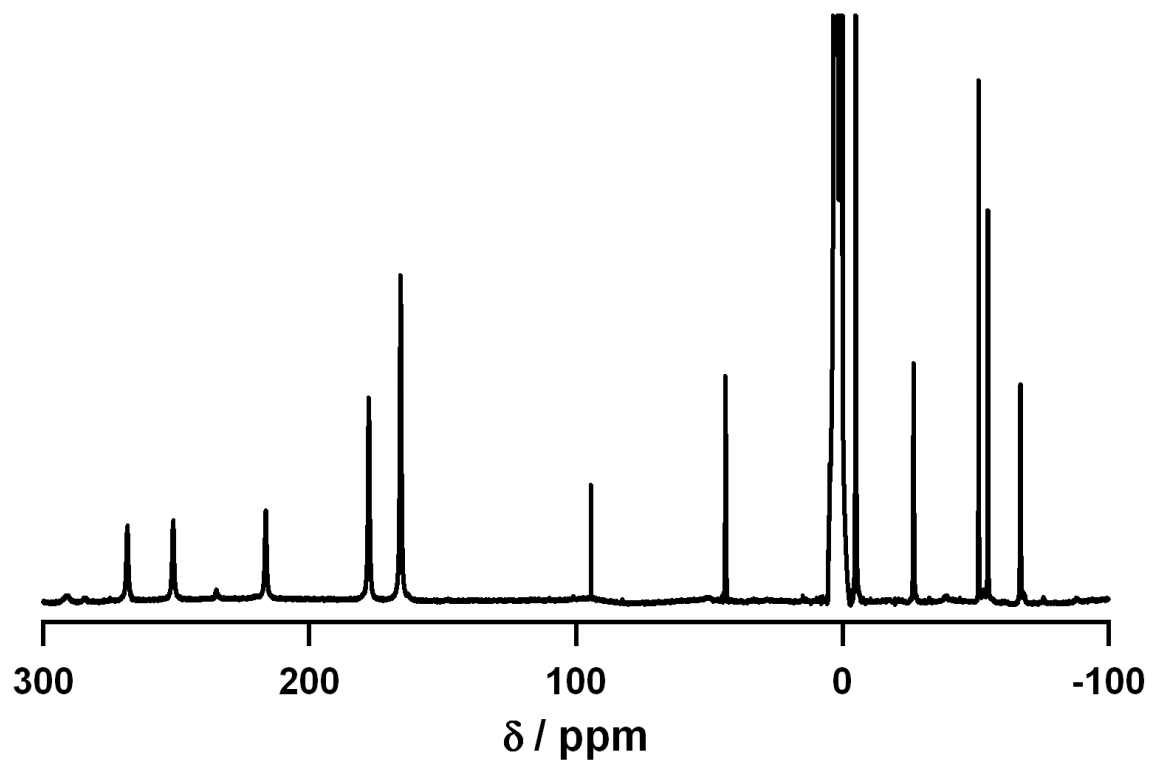

*Figure S3.*  $^1\text{H}$  NMR spectrum of **2** in acetonitrile- $d_3$  at  $-40\text{ }^\circ\text{C}$ .
